# Supplementary material for: Insight into different-microstructured ZnO/graphene-functionalized separators affecting the performance of lithium–sulfur batteries
Source: Royal Society of Chemistry journal article supplement (doi:10.1039/c8ta12409d), 2019-01-01
Supplement: c8ta12409d1.pdf [file c8ta12409d1.pdf]

## Supporting Information

### Insight into different-microstructured ZnO/graphene functionalized separators affecting the performance of lithium–sulfur batteries

Nianxiang Shi,<sup>a</sup> Baojuan Xi,<sup>\*a</sup> Zhenyu Feng,<sup>a</sup> Fangfang Wu,<sup>a</sup> Denghu Wei,<sup>b</sup> Jing Liu,<sup>c</sup> and Shenglin Xiong<sup>a,\*</sup>

<sup>a</sup> Key Laboratory of the Colloid and Interface Chemistry, Ministry of Education, and School of Chemistry and Chemical Engineering, Shandong University, Jinan, 250100, PR China

<sup>b</sup> School of Materials Science and Engineering, Liaocheng University, Liaocheng, Shandong 252059, PR China

<sup>c</sup> College of Materials Science and Engineering, Qingdao University of Science and Technology, Qingdao 266042, China

\*Correspondence and requests for materials should be addressed to B. J. Xi (email: [bajuanxi@sdu.edu.cn](mailto:bajuanxi@sdu.edu.cn))

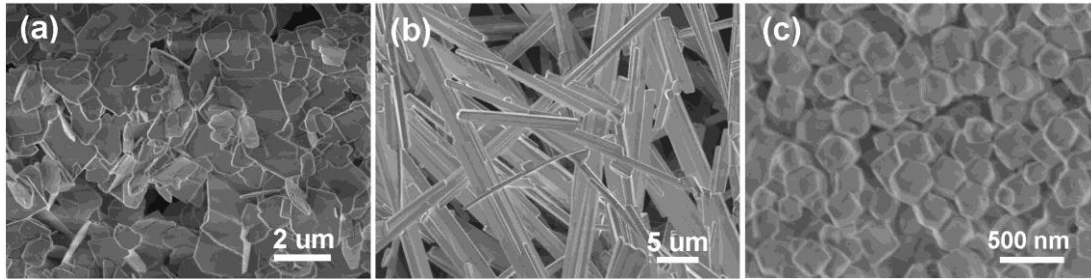

**Figure S1.** The SEM images of different dimensional ZnO precursors.

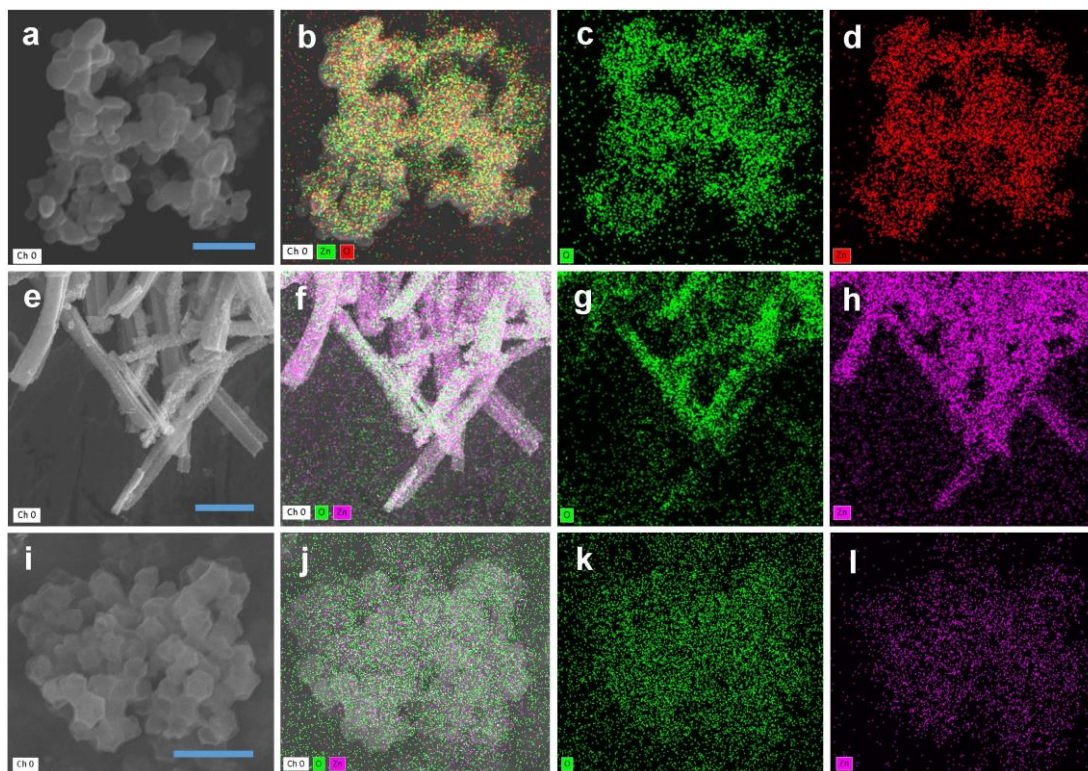

**Figure S2.** The elemental mappings images of 0D (a-d), 1D (e-h) and 3D (i-l) ZnO. Scale bar: (a) 350 nm (e) 3.5  $\mu\text{m}$ , (i) 500 nm.

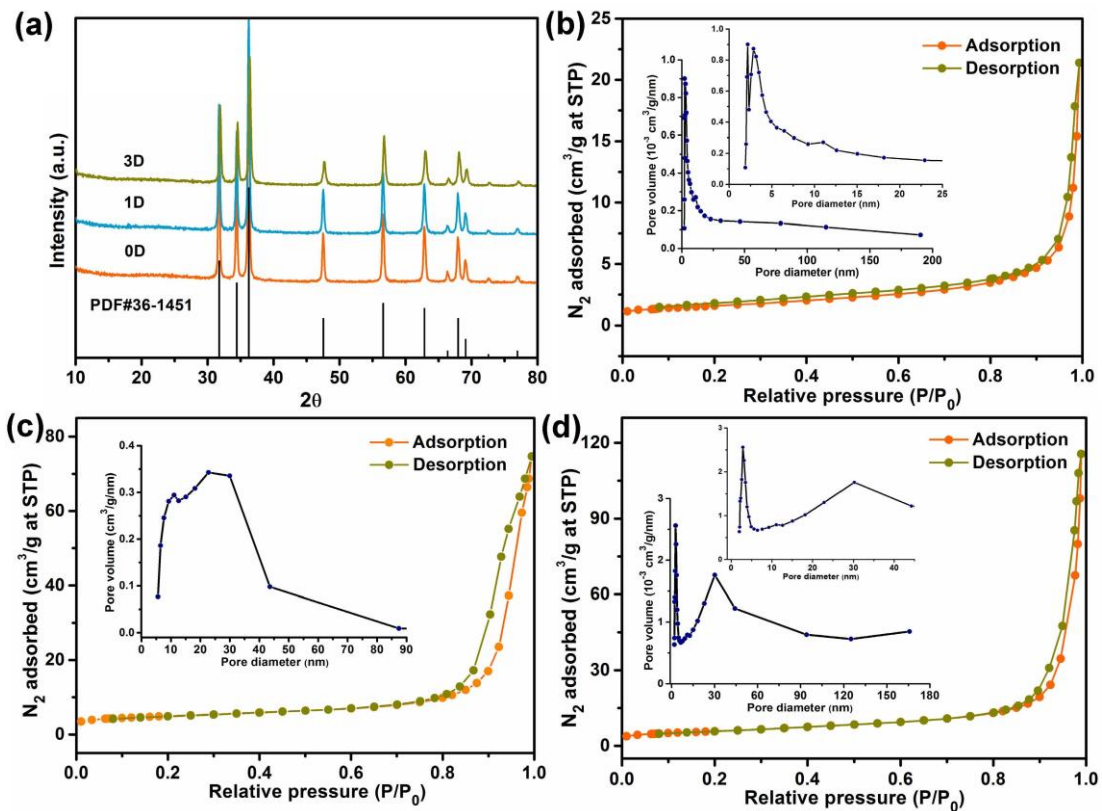

**Figure S3.** (a) The XRD patterns, (b-d)  $N_2$  adsorption-desorption isotherms and pore-size distribution curves of 0D, 1D and 3D ZnO.

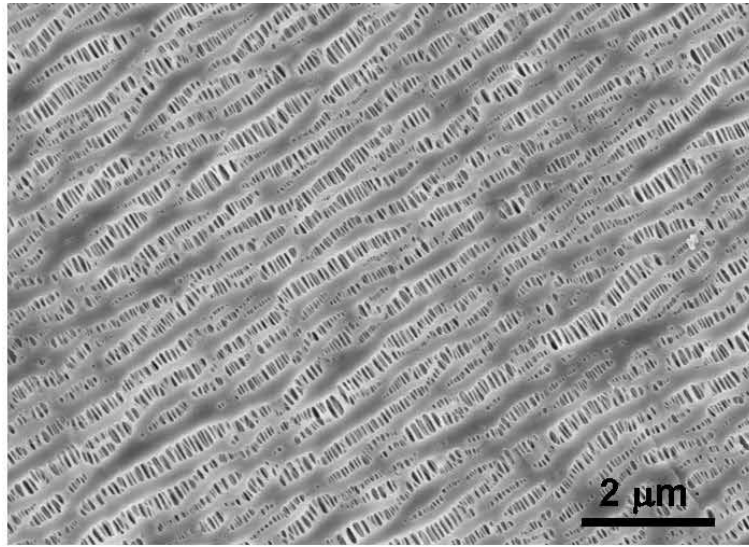

**Figure S4.** FESEM image of the pristine 2400 Celgard film.

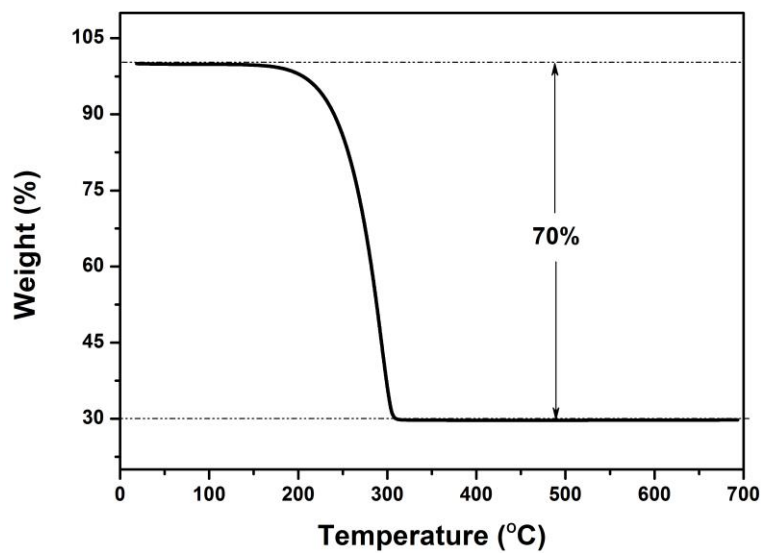

**Figure S5.** The TGA curve of the composite of carbon black and sulfur.

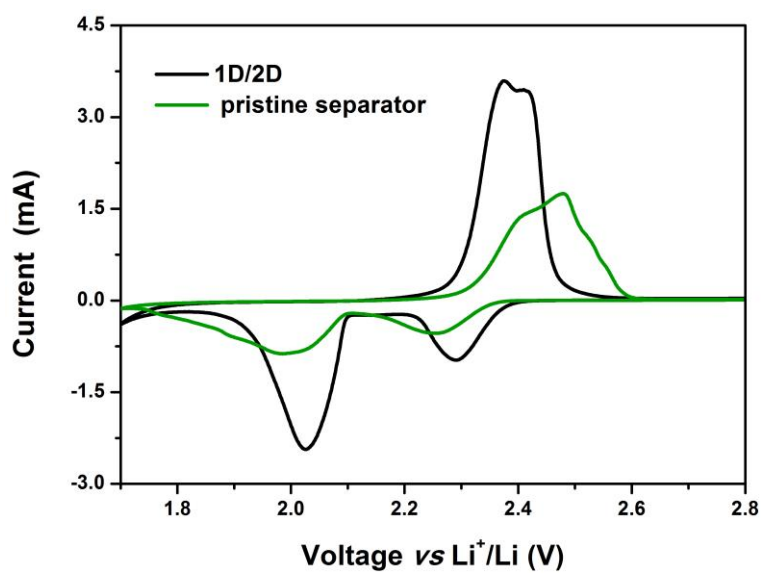

**Figure S6.** The 2<sup>nd</sup> cycle CV curves of the batteries with different separators at the scan rate of 0.1 mV s<sup>-1</sup>.

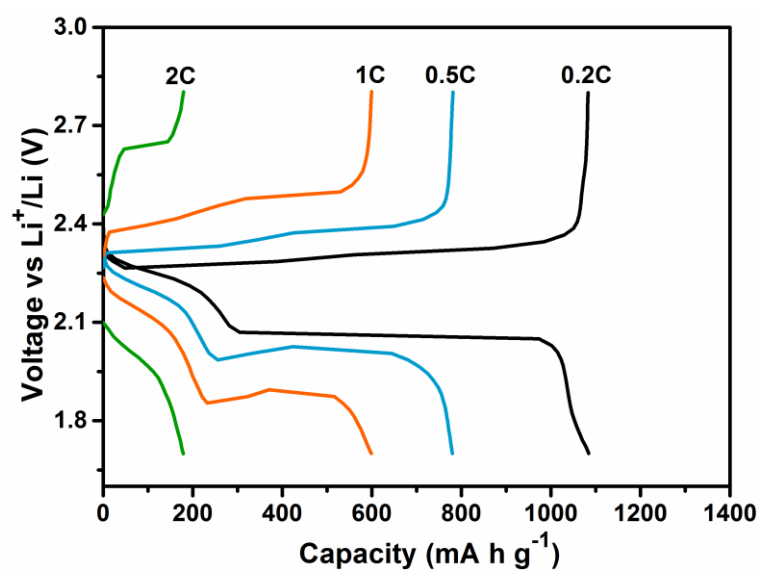

**Figure S7.** The galvanostatical charge/discharge curves of sulfur cell with the pristine separator.



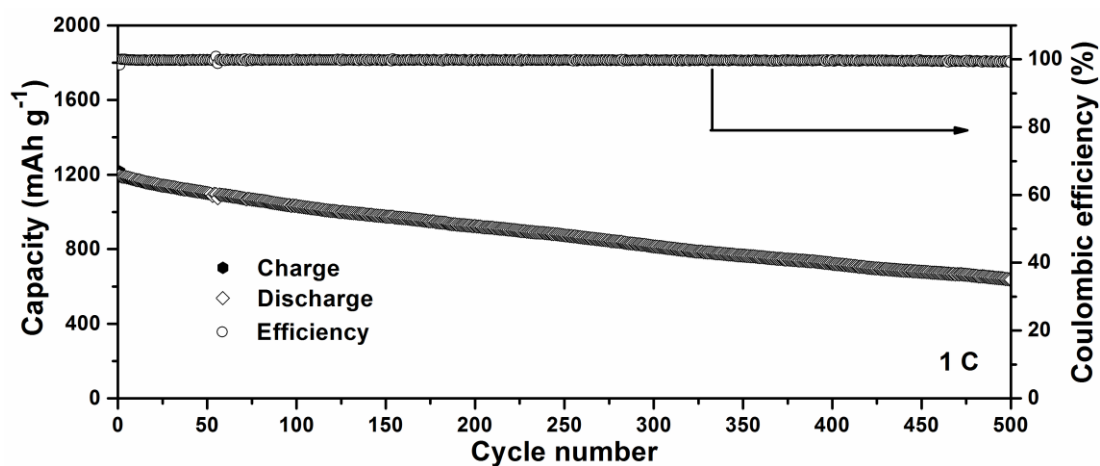

**Figure S8.** The long cycling performance of 1D/2D cell at the current density of 1 C.

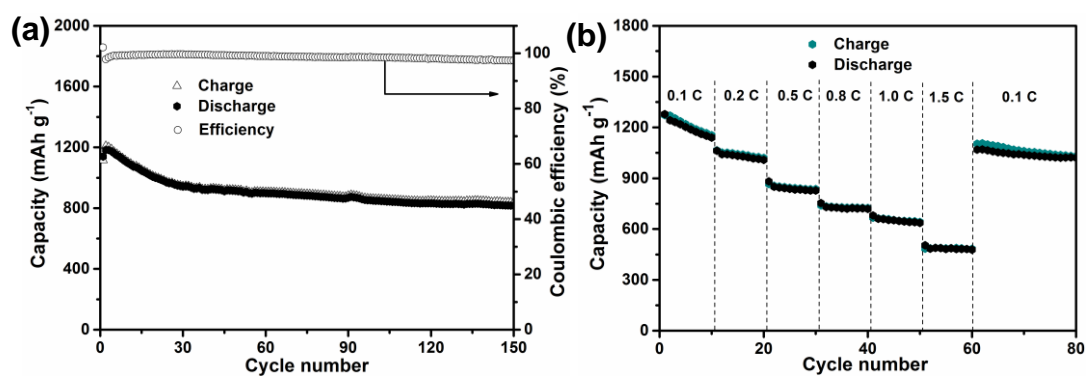

**Figure S9.** (a) Cycling performance at the current density of 0.2 C and (b) rate capability at various current densities of the sulfur cell with an areal sulfur mass of 3.5 mg/cm<sup>2</sup> and 1D/2D membrane.

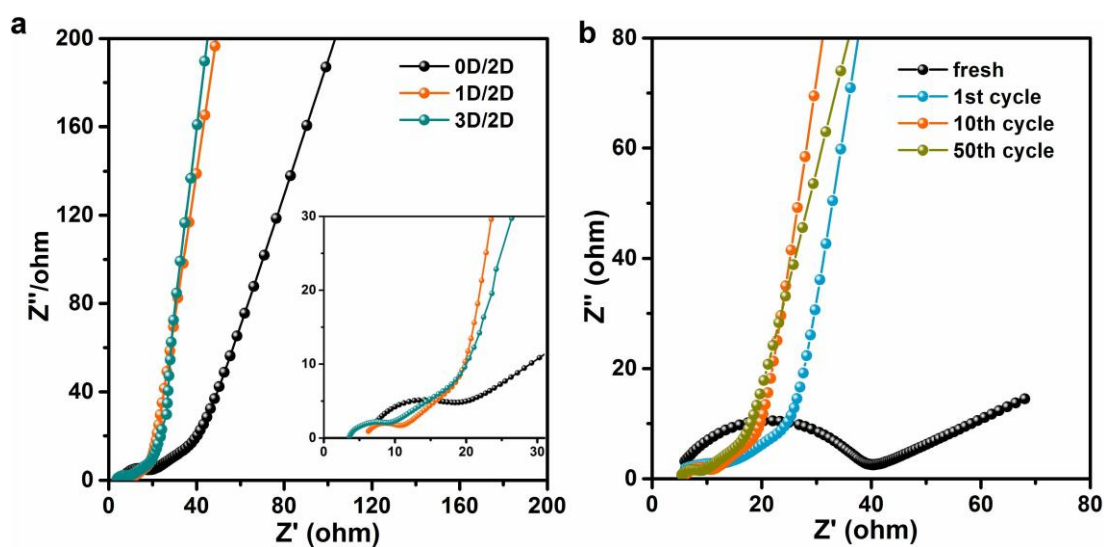

**Figure S10.** (a) The electrochemical impedance spectra (EIS) of cells with 0D/2D, 1D/2D and 3D/2D separators after 10 cycles at the current density of 0.2 C. (b) The EIS of the cell with 1D/2D separator after different discharge/charge cycles at 0.2 C.

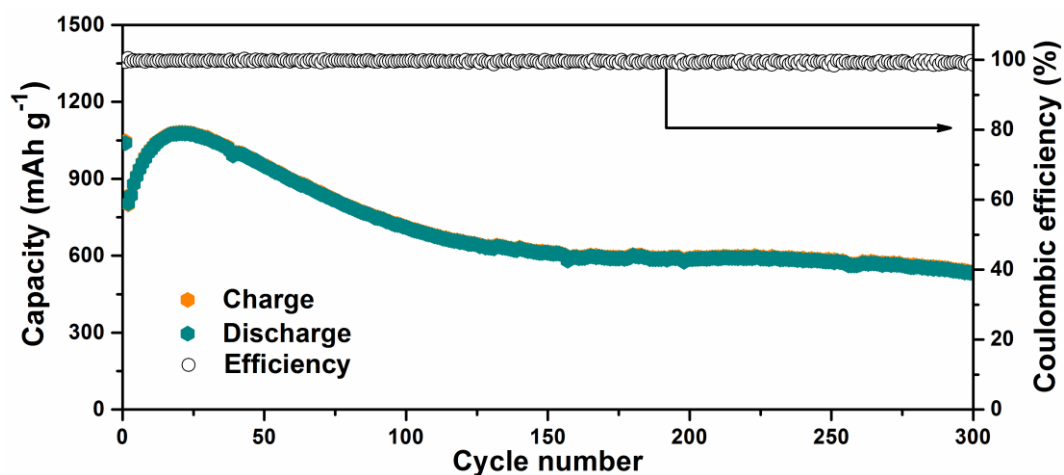

**Figure S11.** The cycling performance of the cell with 2D graphene coated separator at the current density of 2 C.

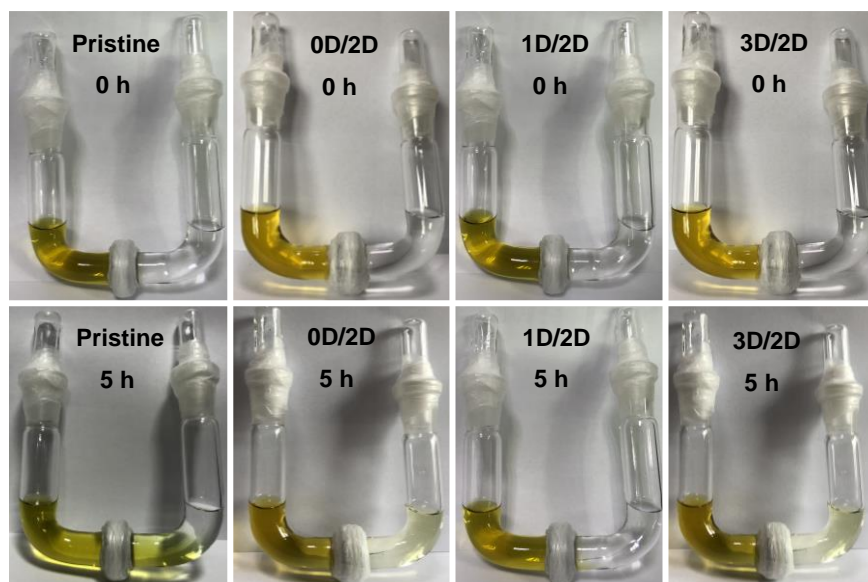

**Figure S12.** The polysulfide permeability experiments of different functional separators.

**Table S1.** Comparison of the performance with the recently reported LBSs.

| Sample                            | Coated mass (mg/cm <sup>2</sup> ) | Discharge capacity                                                                                 | Rate performance                                                                                     | Ref       |
|-----------------------------------|-----------------------------------|----------------------------------------------------------------------------------------------------|------------------------------------------------------------------------------------------------------|-----------|
| ZnO/graphene                      | 0.4                               | 927.1 mAh g <sup>-1</sup> / 200 cycles at 1.0 C<br>641.6 mAh g <sup>-1</sup> / 500 cycles at 1.0 C | 807.5 mAh g <sup>-1</sup> at 4.0 C<br>754.1 mAh g <sup>-1</sup> at 6.0 C                             | This work |
| G-LTO@PP                          | 0.346                             | 697 mAh g <sup>-1</sup> / 500 cycles at 1.0 C                                                      | 780 mAh g <sup>-1</sup> at 1.0 C<br>709 mAh g <sup>-1</sup> at 2.0 C                                 | [S1]      |
| PAN/GO                            |                                   | 597 mAh g <sup>-1</sup> / 100 cycles at 0.2 C                                                      | 448 mAh g <sup>-1</sup> at 1.0 C<br>337 mAh g <sup>-1</sup> at 2.0 C                                 | [S2]      |
| PG                                | 0.54                              | 877 mAh g <sup>-1</sup> / 150 cycles at 0.5 C                                                      | 479 mAh g <sup>-1</sup> at 5.0 C                                                                     | [S3]      |
| En GPA                            | 1.22                              | 800 mAh g <sup>-1</sup> /100 cycles at 0.2 C                                                       | 780 mAh g <sup>-1</sup> at 2.0 C                                                                     | [S4]      |
| MBOH/CNT                          | 0.3                               | 785 mAh g <sup>-1</sup> / 200 cycles at 0.5 C                                                      | 624 mAh g <sup>-1</sup> at 4.0 C<br>500 mAh g <sup>-1</sup> at 6.0 C                                 | [S5]      |
| HNCf@pδ-MnO <sub>2</sub>          |                                   | 856.1 mAh g <sup>-1</sup> / 200 cycles at 0.5 C                                                    | 554 mAh g <sup>-1</sup> at 2.0 C                                                                     | [S6]      |
| MWCNTs/NCQDs                      | 0.15                              | 650.7 mAh g <sup>-1</sup> / 500 cycles at 0.5 C                                                    | 666.7 mAh g <sup>-1</sup> at 3.0 C                                                                   | [S7]      |
| rGO@MoS <sub>2</sub>              | 0.24                              | 368 mAh g <sup>-1</sup> / 500 cycles at 1.0 C                                                      | 745 mAh g <sup>-1</sup> at 1.0 C<br>615 mAh g <sup>-1</sup> at 2.0 C                                 | [S8]      |
| PG-Fe <sub>3</sub> O <sub>4</sub> | 0.478                             | 659 mAh g <sup>-1</sup> / 497 cycles at 1.0 C                                                      | 673 mAh g <sup>-1</sup> at 1.0 C<br>589 mAh g <sup>-1</sup> at 2.0 C                                 | [S9]      |
| Ti <sub>3</sub> C <sub>2</sub>    | 0.32                              | 721 mAh g <sup>-1</sup> / 100 cycles at 0.5 A g <sup>-1</sup>                                      | 476 mAh g <sup>-1</sup> at 2.0 A g <sup>-1</sup>                                                     | [S10]     |
| phosphorus                        | 0.4                               | 800 mAh g <sup>-1</sup> / 100 cycles at 0.5 A g <sup>-1</sup>                                      | 725 mAh g <sup>-1</sup> at 1.8 A g <sup>-1</sup><br>623 mAh g <sup>-1</sup> at 3.5 A g <sup>-1</sup> | [S11]     |
| HCCP/rGO                          |                                   | 565.2 mAh g <sup>-1</sup> / 130 cycles at 1.0 A g <sup>-1</sup>                                    |                                                                                                      | [S12]     |
| CNT@ZIF                           | 0.9                               | 870 mAh g <sup>-1</sup> / 100 cycles at 0.2 C                                                      | 750.5 mAh g <sup>-1</sup> at 1.0 C<br>583.2 mAh g <sup>-1</sup> at 2.0 C                             | [S13]     |
| CNT/MoP <sub>2</sub>              |                                   | 543 mAh g <sup>-1</sup> / 500 cycles at 0.1 C                                                      | 521 mAh g <sup>-1</sup> at 2.0 C<br>360 mAh g <sup>-1</sup> at 5.0 C                                 | [S14]     |
| LNS/CB                            | 0.7                               | 838 mAh g <sup>-1</sup> / 500 cycles at 0.2 C                                                      | 758 mAh g <sup>-1</sup> at 2.0 C                                                                     | [S15]     |

[S1] Y. Zhao, M. Liu, W. Lv, Y.-B. He, C. Wang, Q. Yun, B. Li, F. Kang, Q.-H. Yang, *Nano Energy* **2016**, *30*, 1.

[S2] J. Zhu, C. Chen, Y. Lu, J. Zang, M. Jiang, D. Kim, X. Zhang, *Carbon* **2016**, *101*, 272.

[S3] P.-Y. Zhai, H.-J. Peng, X.-B. Cheng, L. Zhu, J.-Q. Huang, W. Zhu, Q. Zhang, *Energy Storage Materials* **2017**, *7*, 56.

- [S4] R. Song, R. Fang, L. Wen, Y. Shi, S. Wang, F. Li, *J. Power Source* **2016**, 301, 179.
- [S5] L. Kong, H.-J. Peng, J.-Q. Huang, W. Zhu, G. Zhang, Z.-W. Zhang, P.-Y. Zhai, P. Sun, J. Xie, Q. Zhang, *Energy Storage Materials* **2017**, 8, 153.
- [S6] Y. Lai, P. Wang, F. Qin, M. Xu, J. Li, K. Zhang, Z. Zhang, *Energy Storage Materials* **2017**, 9, 179.
- [S7] Y. Pang, J. Wei, Y. Wang, Y. Xia, *Adv. Energy Mater.* **2018**, 8, 1702288.
- [S8] L. Tan, X. Li, Z. Wang, H. Guo, J. Wang, *ACS Appl. Mater. Interfaces* **2018**, 10, 3707.
- [S9] Y. Liu, X. Qin, S. Zhang, G. Liang, F. Kang, G. Chen, B. Li, *ACS Appl. Mater. Interfaces* **2018**, 10, 26264.
- [S10] C. Lin, W. Zhang, L. Wang, Z. Wang, W. Zhao, W. Duan, Z. Zhao, B. Liu, J. Jin, *J. Mater. Chem. A*, **2016**, 4, 5993.
- [S11] J. Sun, Y. Sun, M. Pasta, G. Zhou, Y. Li, W. Liu, F. Xiong, Y. Cui, *Adv. Mater.* **2016**, 28, 9797.
- [S12] Y. Zheng, H. Fan, H. Li, C. Fan, H. Yuan, Z. Yang, K. Huang, W. Li, J. Zhang, *Chem. Eur. J.* **2018**, 24, 1.
- [S13] F. Wu, S. Zhao, L. Chen, Y. Lu, Y. Su, Y. Jia, L. Bao, J. Wang, S. Chen, R. Chen, *Energy Storage Materials* **2018**, 14, 383.
- [S14] Y. Luo, N. Luo, W. Kong, H. Wu, K. Wang, S. Fan, W. Duan, J. Wang, *Small* **2018**, 14, 1702853.
- [S15] Y. Yang, J. Zhang, *Adv. Energy Mater.* **2018**, 8, 1801778.
